# Supplementary material for: Azaisoindigo conjugated polymers for high performance n-type and ambipolar thin film transistor applications
Source: Royal Society of Chemistry journal article supplement (doi:10.1039/c6tc03000a), 2016-01-01
Supplement: c6tc03000a1.pdf [file c6tc03000a1.pdf]

## Supporting Information for

# Diazaisoindigo Conjugated Polymers for High Performance N-type and Ambipolar Thin Film Transistors Application

*Wan Yue*,\*,<sup>a</sup> *Mark Nikolka*,<sup>b</sup> *Mingfei Xiao*,<sup>b</sup> *Aditya Sadhanala*,<sup>b</sup> *Christian B. Nielsen*,<sup>a,c</sup> *Andrew J. P. White*,<sup>a</sup> *Hung-Yang Chen*,<sup>a</sup> *Ada Onwubiko*,<sup>a</sup> *Henning Sirringhaus*,<sup>b</sup> and *Iain McCulloch*<sup>a,d</sup>

<sup>a</sup>Department of Chemistry and Centre for Plastic Electronics, Imperial College London  
London, SW7 2AZ, United Kingdom

<sup>b</sup>Cavendish Laboratory, University of Cambridge, J. J. Thompson Avenue, Cambridge, CB3 0HE, United Kingdom

<sup>c</sup>Materials Research Institute and School of Biological and Chemical Sciences, Queen Mary University of London, Mile End Road, London E1 4NS, United Kingdom

<sup>d</sup>King Abdullah University of Science and Technology (KAUST), SPERC, Thuwal, 23955-6900, Saudi Arabia

### Corresponding Author

\* (W.Y) Email: [w.yue@imperial.ac.uk](mailto:w.yue@imperial.ac.uk)

## Contents

|                                                              |    |
|--------------------------------------------------------------|----|
| 1. TGA of polymers .....                                     | S2 |
| 2. DSC of polymers.....                                      | S2 |
| 3. The Single crystal structure of 5.....                    | S3 |
| 4. Temperature –dependent UV-vis absorption of polymers..... | S4 |
| 5. DFT Model of Polymers.....                                | S4 |
| 6. OFETs Characterization.....                               | S5 |
| 7. AFM Characterization.....                                 | S5 |
| 8. Experimental details .....                                | S6 |

## 1. TGA of Polymers

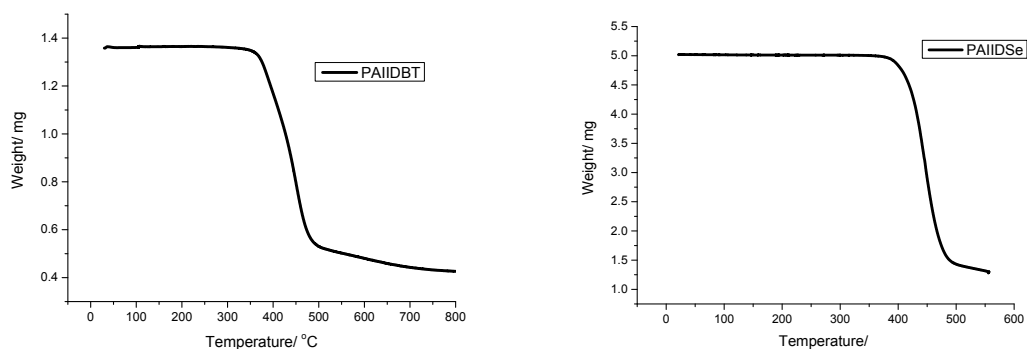

**Figure S1:** Thermal gravimetric analysis (TGA) of polymer **PAIIBT** (Td: 375 °C) and **PAIDSe** (Td: 410 °C) recorded at 30 °C /min in a nitrogen atmosphere.

## 2. DSC of Polymers

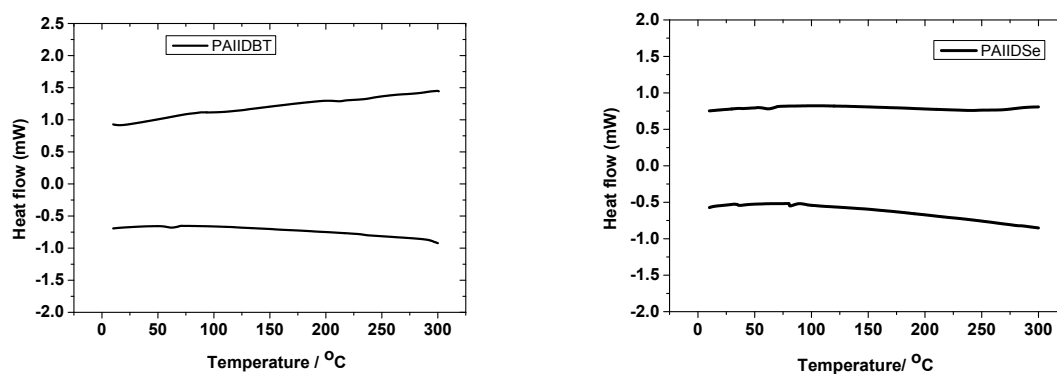

**Figure S2:** DSC traces of **PAIIBT** and **PAIDSe** recorded at 10 °C /min from 0 to 300 °C (the tiny peaks of both polymers are from instrument artefact).

### 3. The X-ray crystal structure of **5**.

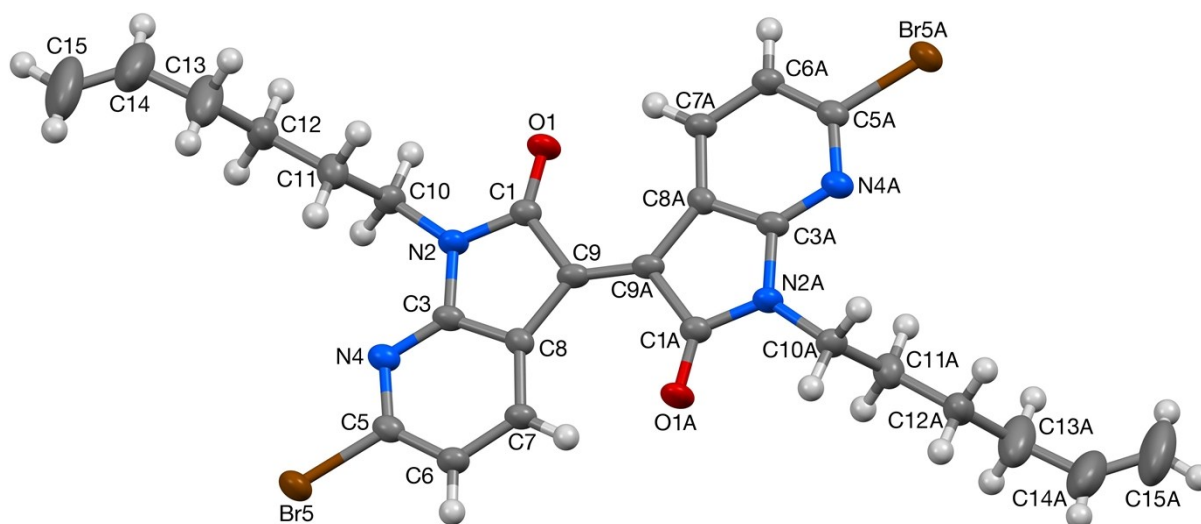

**Figure S3:** The crystal structure of **5** (50% probability ellipsoids).

*Crystal data for 5:* C<sub>26</sub>H<sub>26</sub>Br<sub>2</sub>N<sub>4</sub>O<sub>2</sub>, *M* = 586.33, triclinic, *P*-1 (no. 2), *a* = 4.7412(3), *b* = 7.7243(6), *c* = 16.8734(14) Å,  $\alpha$  = 95.985(7),  $\beta$  = 90.633(6),  $\gamma$  = 92.942(6)°, *V* = 613.69(8) Å<sup>3</sup>, *Z* = 1 [*C<sub>i</sub>* symmetry], *D<sub>c</sub>* = 1.587 g cm<sup>-3</sup>,  $\mu$ (Cu-K $\alpha$ ) = 4.441 mm<sup>-1</sup>, *T* = 173 K, orange platy needles, Agilent Xcalibur PX Ultra A diffractometer; 2331 independent measured reflections (*R*<sub>int</sub> = 0.0403), *F*<sup>2</sup> refinement,<sup>[X1]</sup> *R*<sub>1</sub>(obs) = 0.0417, *wR*<sub>2</sub>(all) = 0.1021, 1968 independent observed absorption-corrected reflections [*|F<sub>o</sub>|* > 4 $\sigma$ (*|F<sub>o</sub>|*), 2 $\theta$ <sub>max</sub> = 147°], 154 parameters.

[CCDC 1483575 contains the supplementary crystallographic data for this paper. These data can be obtained free of charge from The Cambridge Crystallographic Data Centre via [www.ccdc.cam.ac.uk/data\\_request/cif](http://www.ccdc.cam.ac.uk/data_request/cif).]

[X1] (a) SHELXTL, Bruker AXS, Madison, WI; (b) SHELX-97, G.M. Sheldrick, *Acta Cryst.*, **2008**, *A64*, 112-122; (c) SHELX-2013, <http://shelx.uni-ac.gwdg.de/SHELX/index.php>

#### 4. Temperature –dependent UV-vis absorption of polymers.

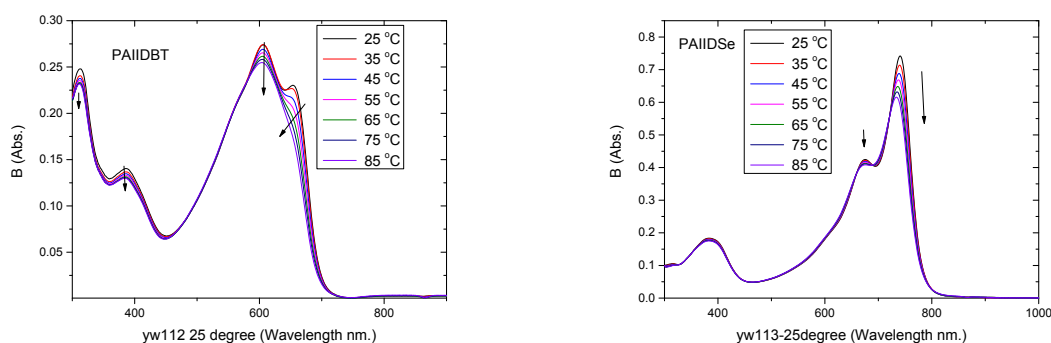

**Figure S4:** Temperature –dependent UV-vis absorption of **PAIIBDT** and **PAIDSe** in dilute chlorobenzene solution.

#### 5. DFT model of polymers

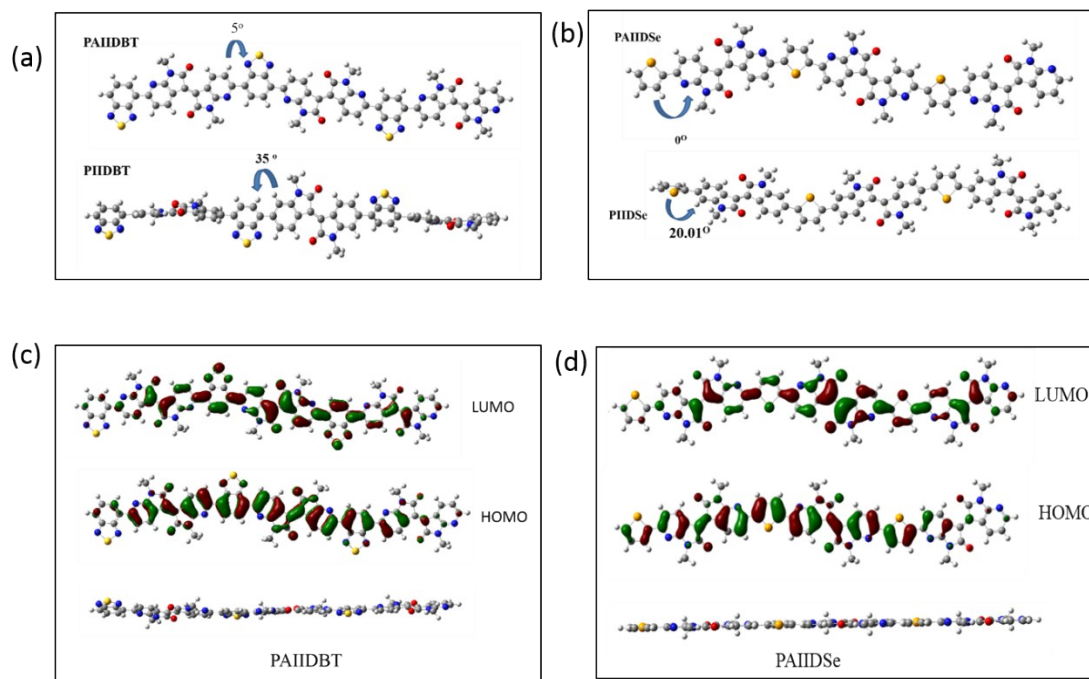

**Figure S5:** Face on DFT images of the **PAIIBDT** and **PIIBDT** (a); Face on DFT images of the **PAIDSe** and **PIIDSe** (b); LUMO, HOMO and side-on DFT images of the minimum-

energy conformation of the trimmers **PAIIBT** (c) and **PAIIDSe** (d) at the B3LYP/6-31G (d,p) level. Alkyl chains were substituted for methyl groups.

## 6. OFETs Characterization

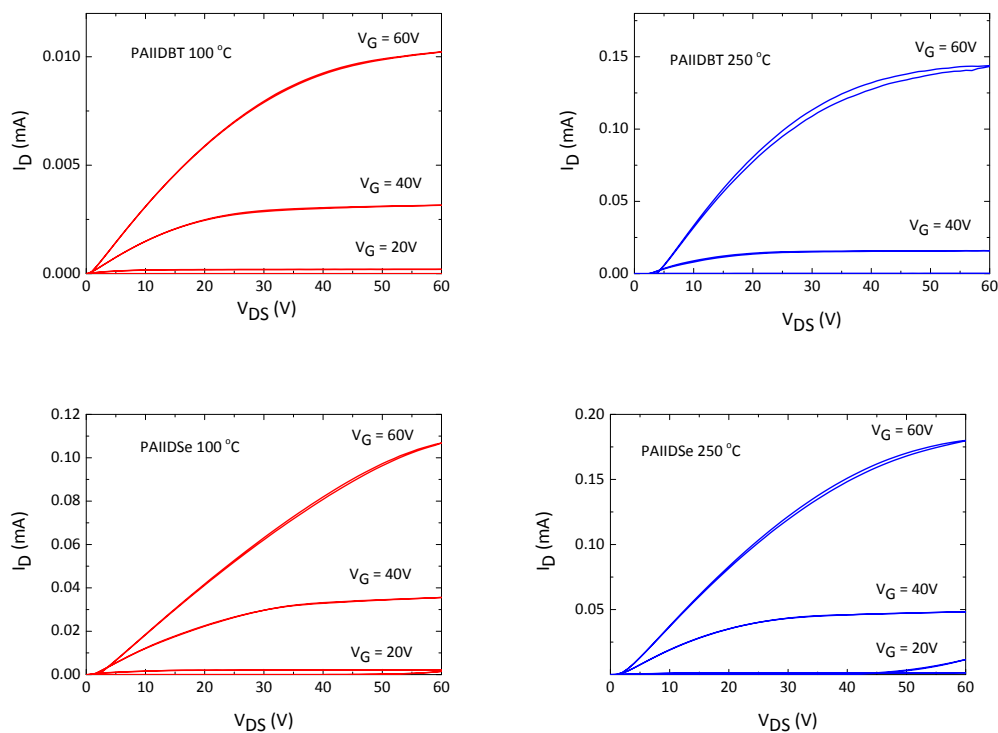

**Figure S6:** Output characteristics of **PAIIBT** (a, b) and **PAIIDSe** (c, d) annealed at 100 °C and 250 °C.

## 7. AFM Characterization

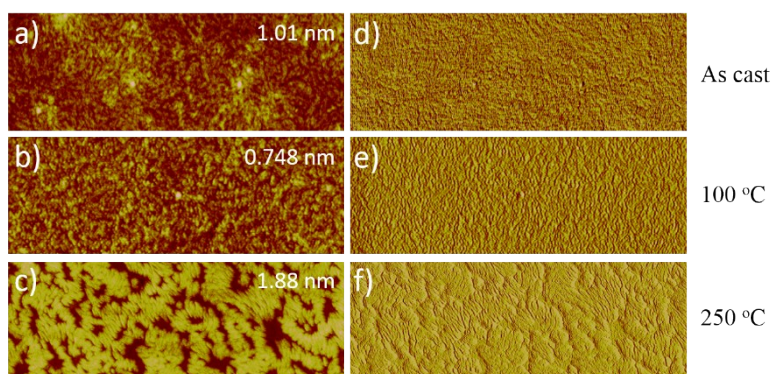

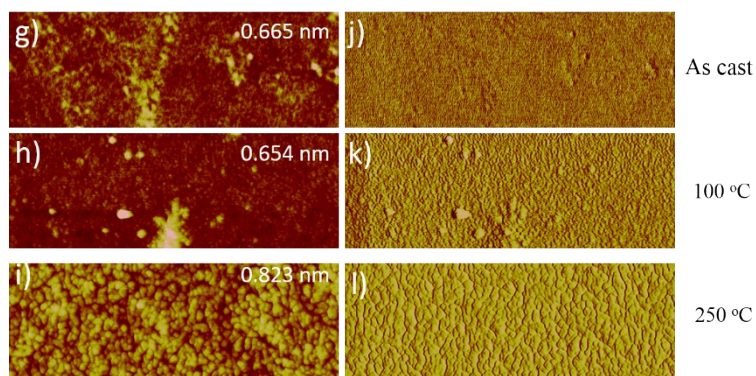

**Figure S7:** AFM topography (a,b,c) and phase (d,e,f) images of **PAIDBT**, and AFM topography (g,h,i) and phase (j,k,l) images of **PAIDSe**, as cast and after annealing at 100 °C and 250 °C. Scan size: 5  $\mu\text{m}$   $\times$  5  $\mu\text{m}$ .

## 8. Experimental details

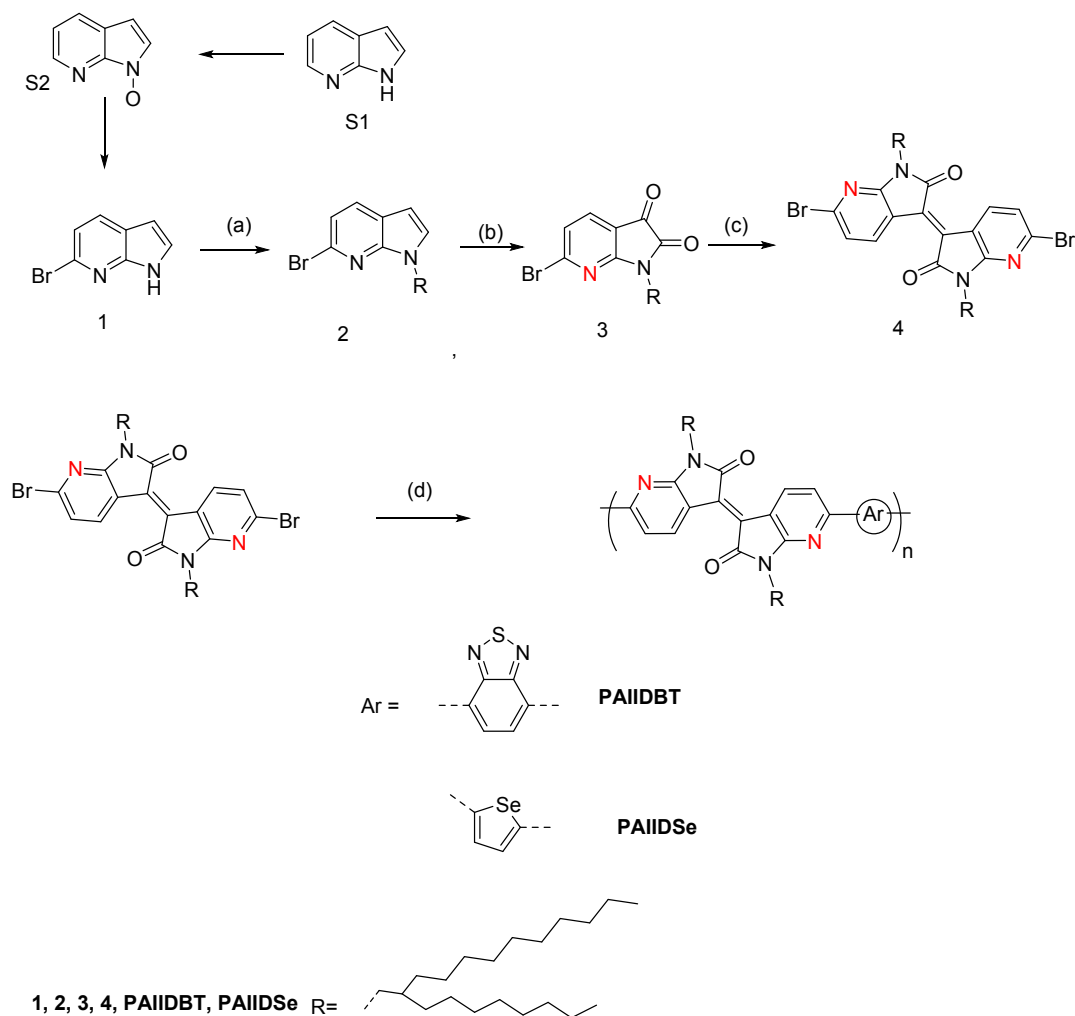

7-azaindole **S1** was purchased from Fluorochem LTD. **S2** and **1** were prepared according to the literature.<sup>[1, 2]</sup>

[1] S. W. Schneller, J.-K Luo, *J. Org. Chem.* **1980**, *45*, 4045-4048.

[2] S. Minakata, M. Komatsu, Y. Ohshiro. *Synthesis* **1992**, 661-663.

## Compounds 2

Compound **1** (1.11 g, 5.6 mmol) was dissolved in dry DMF (30 mL), hydride sodium (290 mg, 60 % in oil) was added to the solution at room temperature and stir for another 45 mins, 1-bromo octyldodecyl (2.4 g, 6.67 mmol) or 1-bromo hexane ( $v = 0.68$  mL, 6.67 mmol) DMF was then added slowly to above mixtures, and the mixture stir overnight. Water was slowly added to quench the reaction until no obvious bubble, extract with ethyl estate for three times, dried with magnesium sulphate, and the solvent was removed with reduced vacuum, the residue was purified with silicon chromatography with DCM to afford a light yellow oil for compounds **2** (2.2 g, 78 %). Compound **2**:  $^1\text{H}$  NMR (400 MHz, Chloroform- $d$ )  $\delta$  7.75 (d,  $J = 8.2$  Hz, 1H), 7.19 (d,  $J = 8.1$  Hz, 1H), 7.16 (d,  $J = 3.5$  Hz, 1H), 6.45 (d,  $J = 3.4$  Hz, 1H), 4.18-4.16 (m, 2H), 1.96-1.99 (m, 1H), 1.30-1.22 (m, 36H), 0.91-0.90 (m, 6H).  $^{13}\text{C}$  NMR (100 MHz, Chloroform- $d$ )  $\delta$  147.46, 134.52, 130.60, 128.32, 119.08, 118.91, 99.64, 48.32, 38.81, 31.93, 31.39, 29.92, 29.64, 29.56, 29.52, 29.35, 26.29, 14.13. HRMS (ESI, pos. mode): Calculated for  $\text{C}_{27}\text{H}_{45}\text{BrN}_2$ : 476.2766,  $[\text{M}+\text{H}]^+$ , found: 477.2849.

## Compound 3

Chromium trioxide (90 mg, 0.91 mmol) in 0.3 ml water was added to a solution of compound **2** (200 mg, 0.39 mmol) in 4 ml AcOH at room temperature for 2 h, the reaction mixture was extracted with chloroform, and the organic phase was collected and dried with magnesium sulphate, solvent was removed by the reduced pressure, purified by column chromatography to afford a bright yellow solid for **3** (175 mg, 88 %). Compound **3**:  $^1\text{H}$  NMR (400 MHz, Methylene Chloride- $d_2$ )  $\delta$  7.68 (d,  $J = 7.7$  Hz, 1H), 7.31 (d,  $J = 7.7$  Hz, 1H), 3.74-3.72 (m, 2H), 2.02-1.99 (m, 1H), 1.34-1.30 (m, 35 H), 0.93-0.90 (m, 6H).  $^{13}\text{C}$  NMR (100 MHz, Chloroform- $d$ )  $\delta$  181.01, 164.51, 158.48, 149.82, 133.86, 123.17, 110.32, 43.64, 31.90, 31.37, 29.89, 29.63, 29.60, 29.55, 26.12, 22.67, 13.86. Cal MS (MALDI-TOF,  $\text{CHCl}_3$ ): calculated for  $\text{C}_{27}\text{H}_{43}\text{BrN}_2\text{O}_2$ : 506.3, found: 505.0.

## Compound 4

A soln of  $\text{P}(\text{NEt}_2)_3$  (0.11 mL, 0.78 mmol) in  $\text{CHCl}_3$  (2 mL) was added dropwise to a solution of appropriate 1-alkylisatin (200 mg, 0.39 mmol) in (4 mL)  $\text{CHCl}_3$  at  $-60^\circ\text{C}$  under bubbling dry argon for 2 min. The mixture was allowed to warm to r.t, and then reflux for overnight. After cooled down, the reaction mixture was purified with silicon column chromatography with the eluting (DCM) to afford compound **4** (60 mg, 31%) as a bright red solid. Compound **4**:  $^1\text{H}$  NMR (400 MHz, Chloroform- $d$ )  $\delta$  9.32 (d,  $J = 8.3$  Hz, 2H), 7.20 (d,  $J = 8.3$  Hz, 2H), 3.78 (m, 4H), 2.06 (m, 2H), 1.31-1.26 (m, 64H), 0.91-0.87 (m, 12H).  $^{13}\text{C}$  NMR (100 MHz, Chloroform- $d$ )  $\delta$  167.76, 158.15, 143.79, 138.97, 131.30, 121.82, 114.30, 109.99, 43.76, 31.93, 31.42, 29.98, 29.68, 29.64, 29.37, 26.16, 22.70, 14.13.

MS (MALDI-TOF,  $\text{CHCl}_3$ ): Calculated for  $\text{C}_{54}\text{H}_{86}\text{Br}_2\text{N}_4\text{O}_2$ , 980.5,  $[\text{M}+\text{H}]^+$ , found: 981.8.

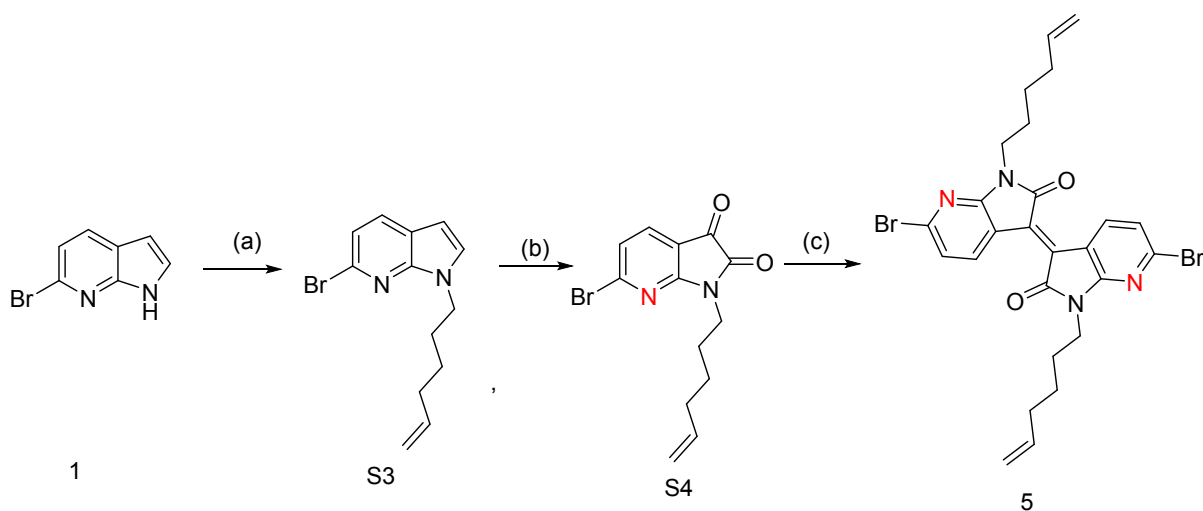

Compound **S3** has been synthesized according to the similar procedure with **2** (89 %).

Compound **S3**:  $^1\text{H}$  NMR (400 MHz, Chloroform- $d$ )  $\delta$  7.75 (d,  $J$  = 8.1 Hz, 1H), 7.20 (d,  $J$  = 8.0 Hz, 2H), 7.18 (d,  $J$  = 3.6 Hz, 1H), 6.45 (d,  $J$  = 3.5 Hz, 1H), 5.95 – 5.62 (m, 1H), 5.15 – 4.77 (m, 2H), 4.28 (m, 2H), 2.43 – 1.98 (m, 2H), 1.97 – 1.79 (m, 2H), 1.58 – 1.30 (m, 2H).  $^{13}\text{C}$  NMR (100 MHz, Chloroform- $d$ )  $\delta$  147.03, 138.24, 134.55, 130.74, 127.92, 99.78, 44.41, 33.24, 29.70, 26.00. HRMS (ESI, pos. mode): Calculated for  $\text{C}_{13}\text{H}_{15}\text{BrN}_2$ : 278.0419,  $[\text{M}+\text{H}]^+$ , found: 279.0497.

Compound **S4** has been synthesized according to the similar procedure with **3** (61 %).

Compound **S4**:  $^1\text{H}$  NMR (400 MHz, Methylene Chloride- $d_2$ )  $\delta$  7.66 (d,  $J$  = 7.7 Hz, 1H), 7.29 (d,  $J$  = 7.7 Hz, 1H), 5.86-5.76 (m, 1H), 5.07 – 4.97 (m, 2H), 3.87– 3.84 (m, 2H), 2.27-2.11 (m, 2H), 1.82 – 1.76 (m, 2H), 1.53 – 1.47 (m, 2H).  $^{13}\text{C}$  NMR (100 MHz, Methylene Chloride- $d_2$ )  $\delta$  180.81, 164.11, 158.10, 150.15, 138.04, 133.99, 123.31, 115.07, 110.28, 39.38, 33.12, 26.86, 25.97. HRMS (ESI, pos. mode): Calculated for  $\text{C}_{13}\text{H}_{13}\text{BrN}_2\text{O}_2+\text{MeOH}$ : 340.0423,  $[\text{M}+\text{MeOH}]^+$ , found: 341.0523.

Compound **5** has been synthesized according to the similar procedure with **4** (39 %).

Compound **5**:  $^1\text{H}$  NMR (400 MHz, Chloroform- $d$ )  $\delta$  9.31 (d,  $J$  = 8.3 Hz, 1H), 7.22 (d,  $J$  = 8.3 Hz, 1H), 5.82 (m, 1H), 5.21 – 4.82 (m, 2H), 3.91 (m, 2H), 2.34 – 1.94 (m, 2H), 1.93 – 1.64 (m, 2H), 1.54 – 1.41 (m, 2H).  $^{13}\text{C}$  NMR (100 MHz, Chloroform- $d$ )  $\delta$  167.49, 157.79, 143.84, 139.11, 138.28, 131.42, 121.96, 114.91, 114.48, 39.41, 33.25, 27.06, 26.01. MS (MALDI-TOF,  $\text{CHCl}_3$ ): Calculated for  $\text{C}_{26}\text{H}_{26}\text{Br}_2\text{N}_4\text{O}_2$ , 584.0423, found, 584.3.

PAIIDBT

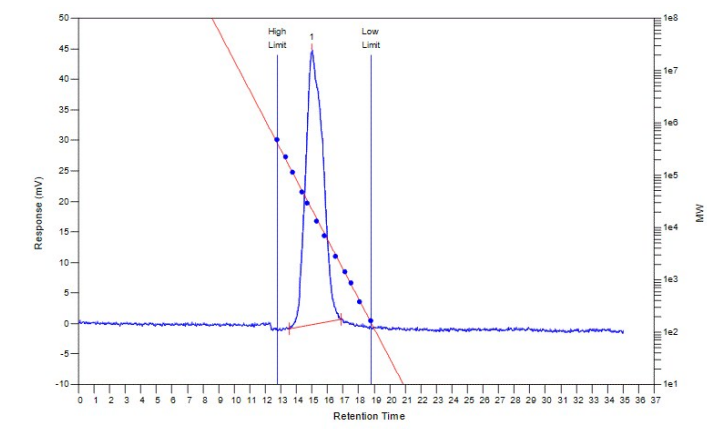

Sample Injection Report

| MW Averages |       |       |       |       |       |       |         |
|-------------|-------|-------|-------|-------|-------|-------|---------|
| Peak No     | Mp    | Mn    | Mw    | Mz    | Mz+1  | Mv    | PD      |
| 1           | 22091 | 13974 | 21765 | 32144 | 44880 | 20446 | 1.55754 |

PAIIDSe

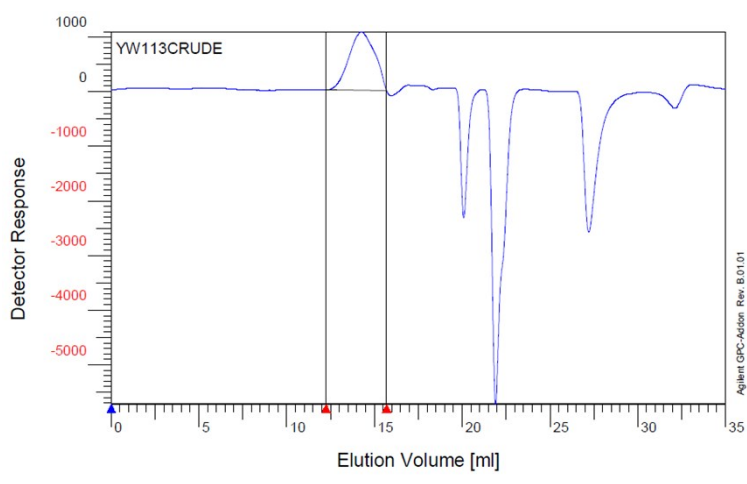

|              |          |       |
|--------------|----------|-------|
| <b>Mn</b> :  | 9.6163e4 | g/mol |
| <b>Mw</b> :  | 1.9374e5 | g/mol |
| <b>Mz</b> :  | 3.7394e5 | g/mol |
| <b>Mv</b> :  | 0.000000 | g/mol |
| <b>D</b> :   | 2.0147e0 |       |
| <b>[n]</b> : | 0.000000 | ml/g  |
| <b>Vp</b> :  | 1.4256e1 | ml    |
| <b>Mp</b> :  | 1.4146e5 | g/mol |
| <b>A</b> :   | 1.8119e3 | ml*V  |
| <b>10%</b>   | 4.2987e4 | g/mol |
| <b>30%</b>   | 8.1805e4 | g/mol |
| <b>50%</b>   | 1.3350e5 | g/mol |
| <b>70%</b>   | 2.1553e5 | g/mol |
| <b>90%</b>   | 4.1899e5 | g/mol |

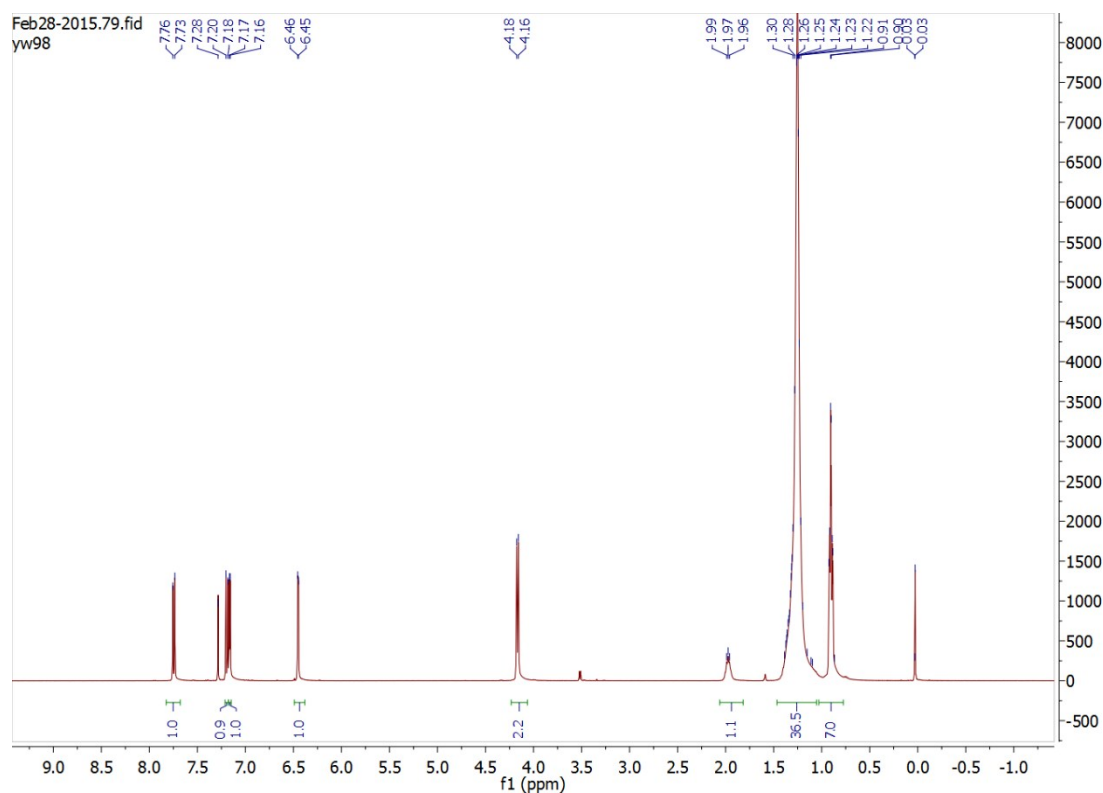

**Figure S8:**  $^1\text{H}$  NMR of compound **2** in Chloroform-d at room temperature.

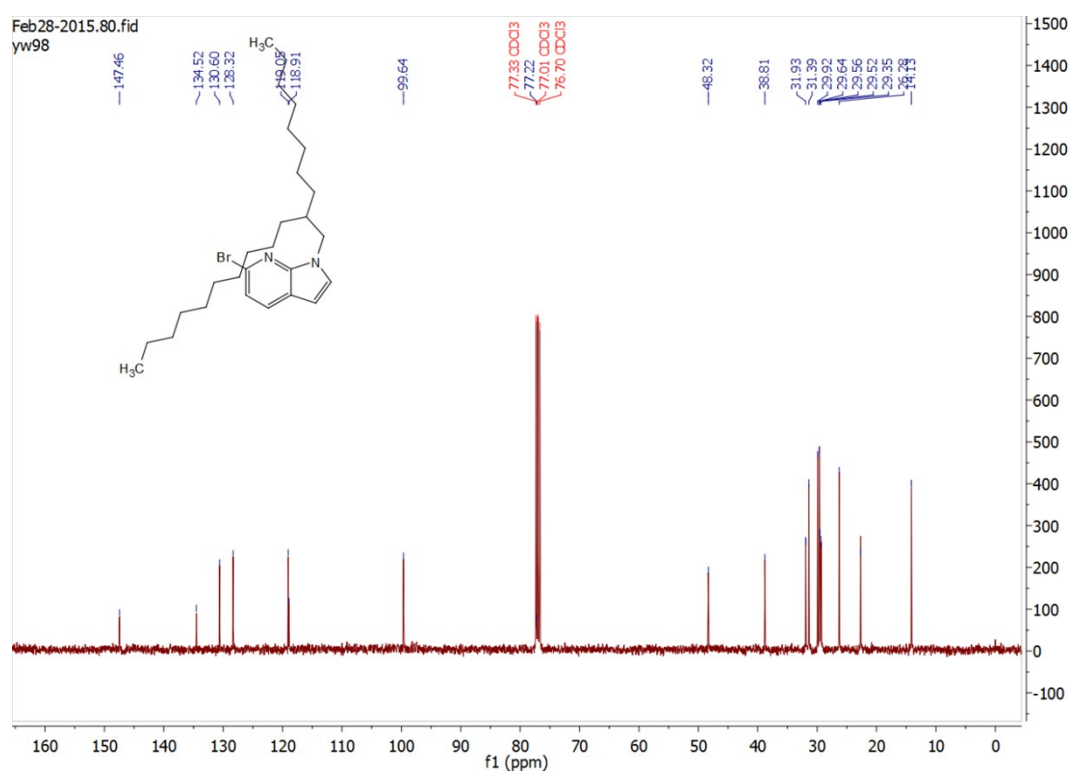

**Figure S9:**  $^{13}\text{C}$  NMR of compound **2** in Chloroform-d at room temperature.

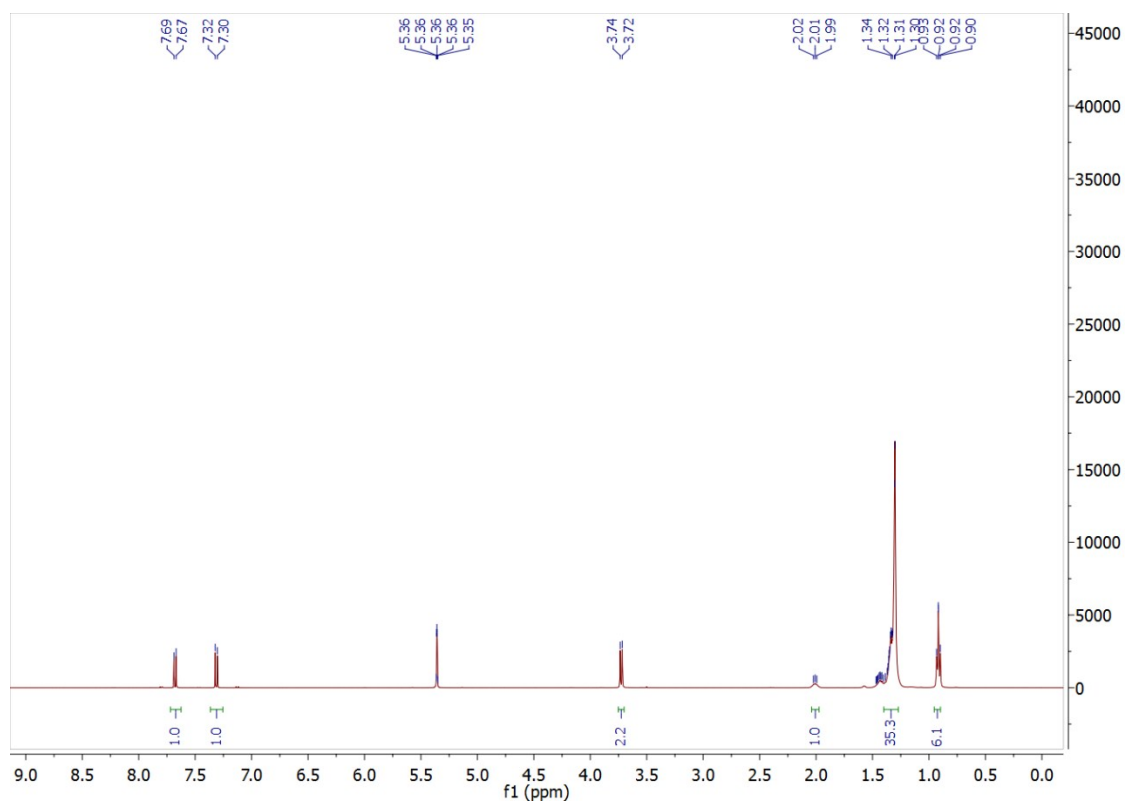

**Figure S10:** <sup>1</sup>H NMR of compound **3** in dichloromethane-d at room temperature.

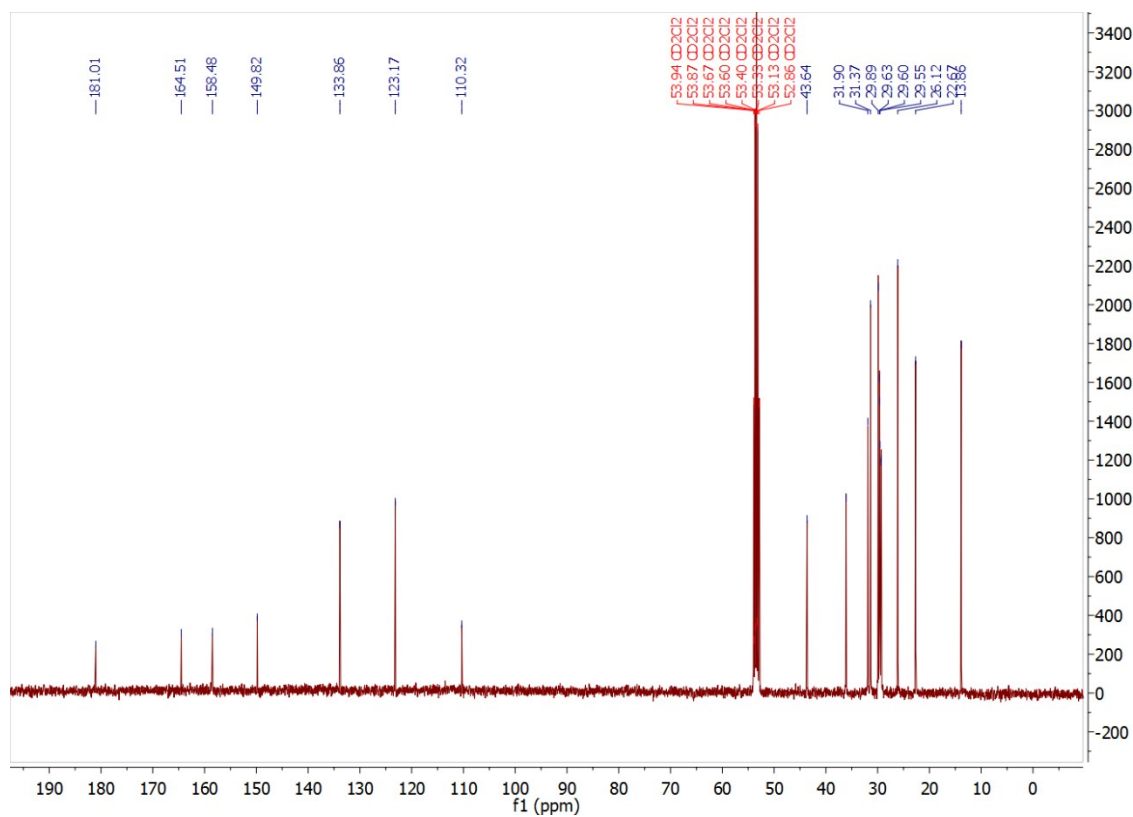

**Figure S11:** <sup>13</sup>C NMR of compound **3** in dichloromethane-d at room temperature.

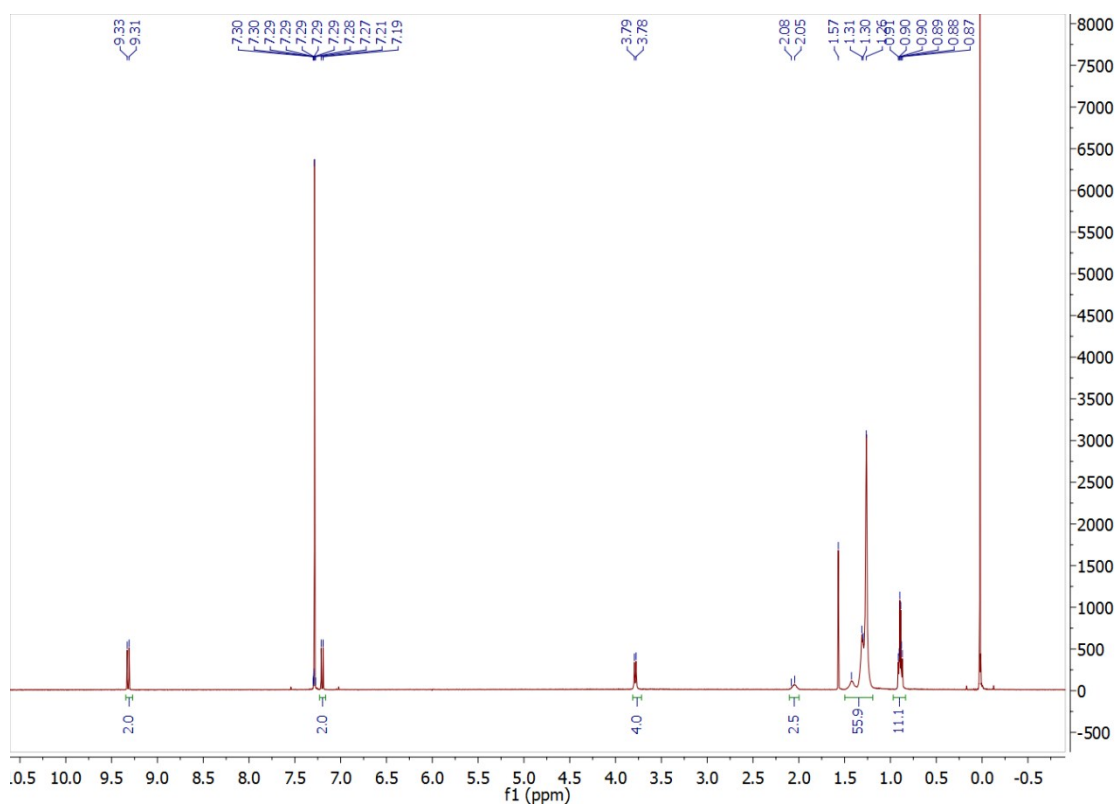

**Figure S12:** <sup>1</sup>H NMR of compound **4** in Chloroform-d at room temperature.

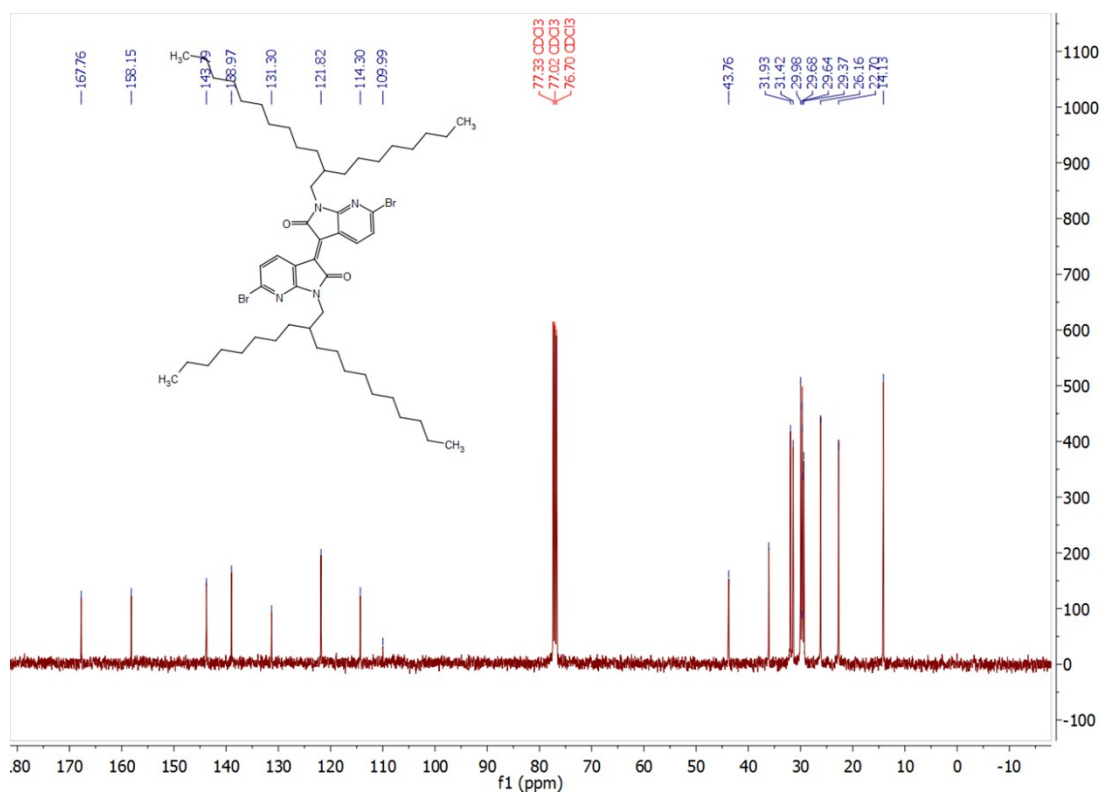

**Figure S13:**  $^{13}\text{C}$  NMR of compound **4** in Chloroform-d at room temperature.

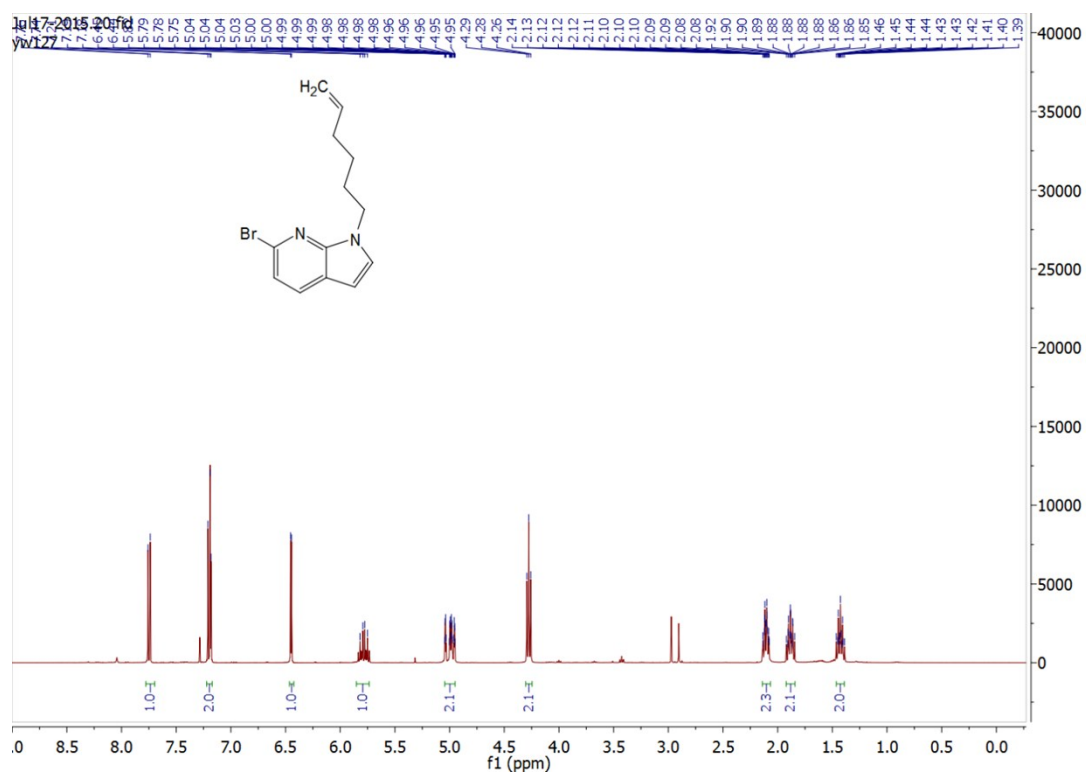

**Figure S14:**  $^1\text{H}$  NMR of compound **S3** in Chloroform-d at room temperature.

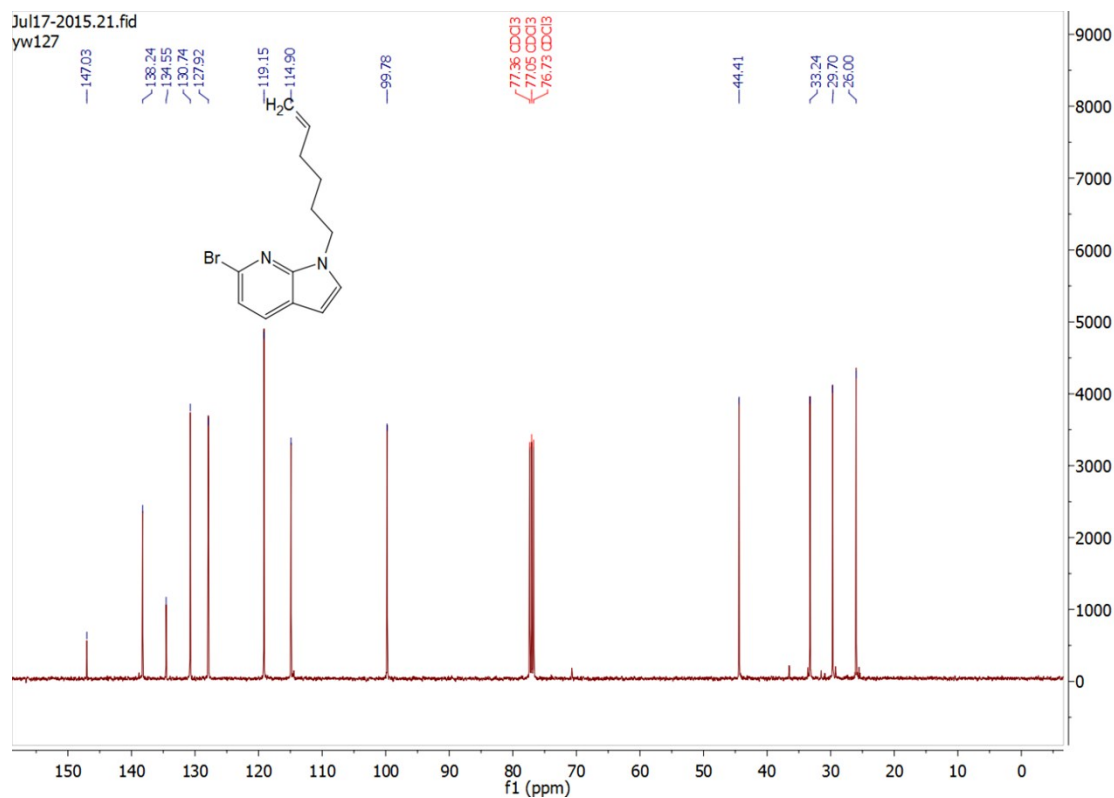

**Figure S15:**  $^{13}\text{C}$  NMR of compound **S3** in Chloroform-d at room temperature.

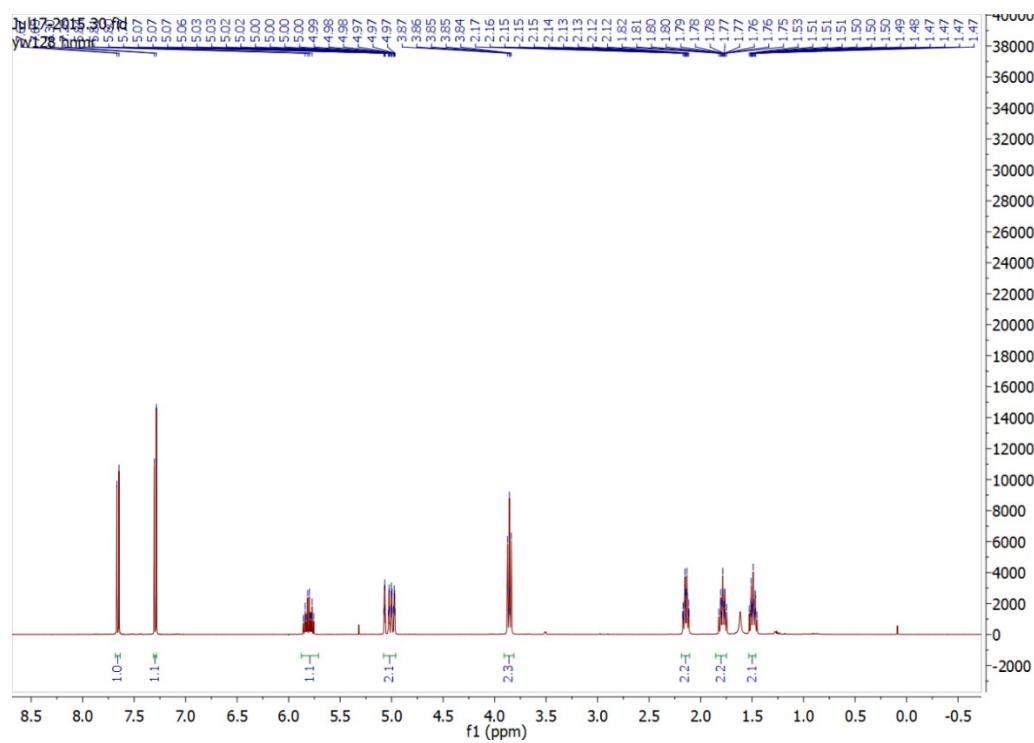

**Figure S16:**  $^1\text{H}$  NMR of compound **S4** in Chloroform-d at room temperature.

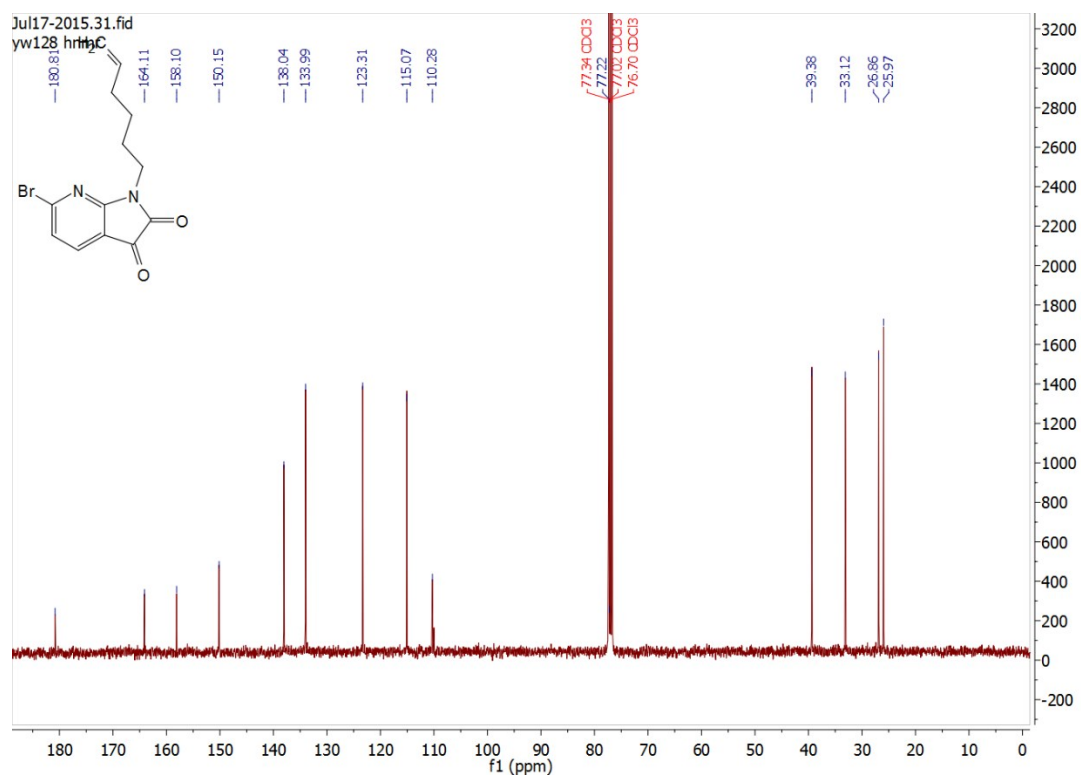

**Figure S17:**  $^{13}\text{C}$  NMR of compound S4 in Chloroform-d at room temperature.

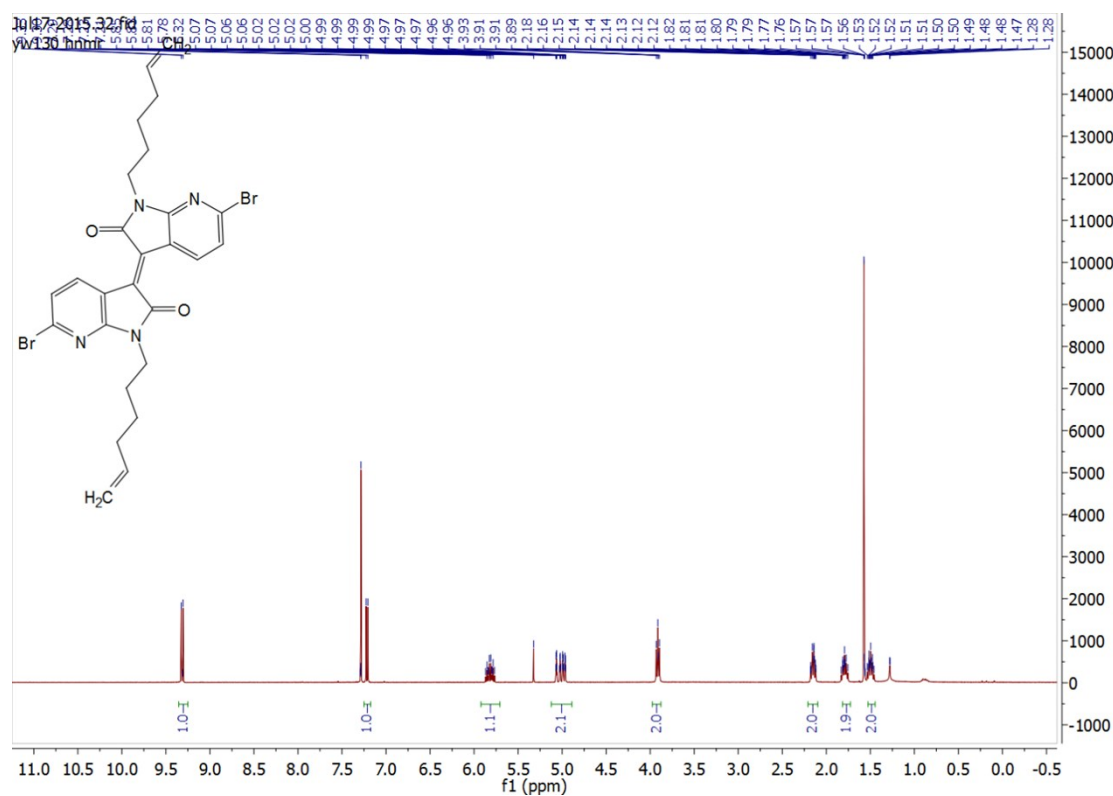

**Figure S18:**  $^1\text{H}$  NMR of compound 5 in Chloroform-d at room temperature.

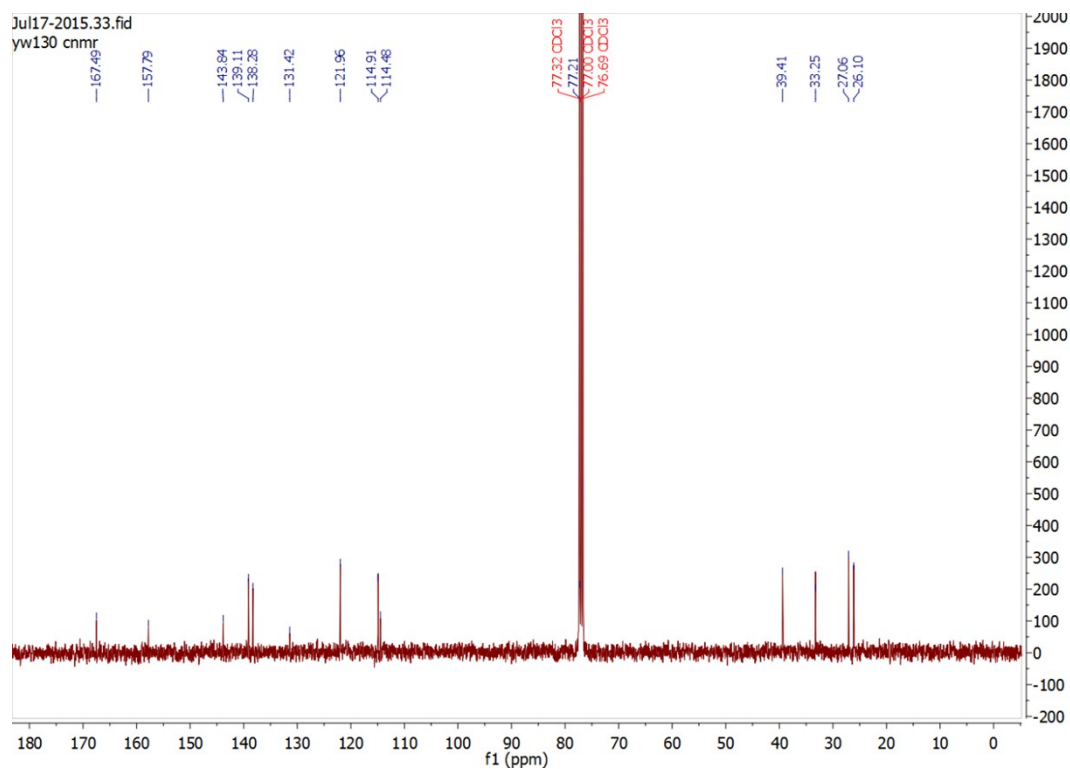

**Figure S19:**  $^{13}\text{C}$  NMR of compound **5** in Chloroform-d at room temperature.

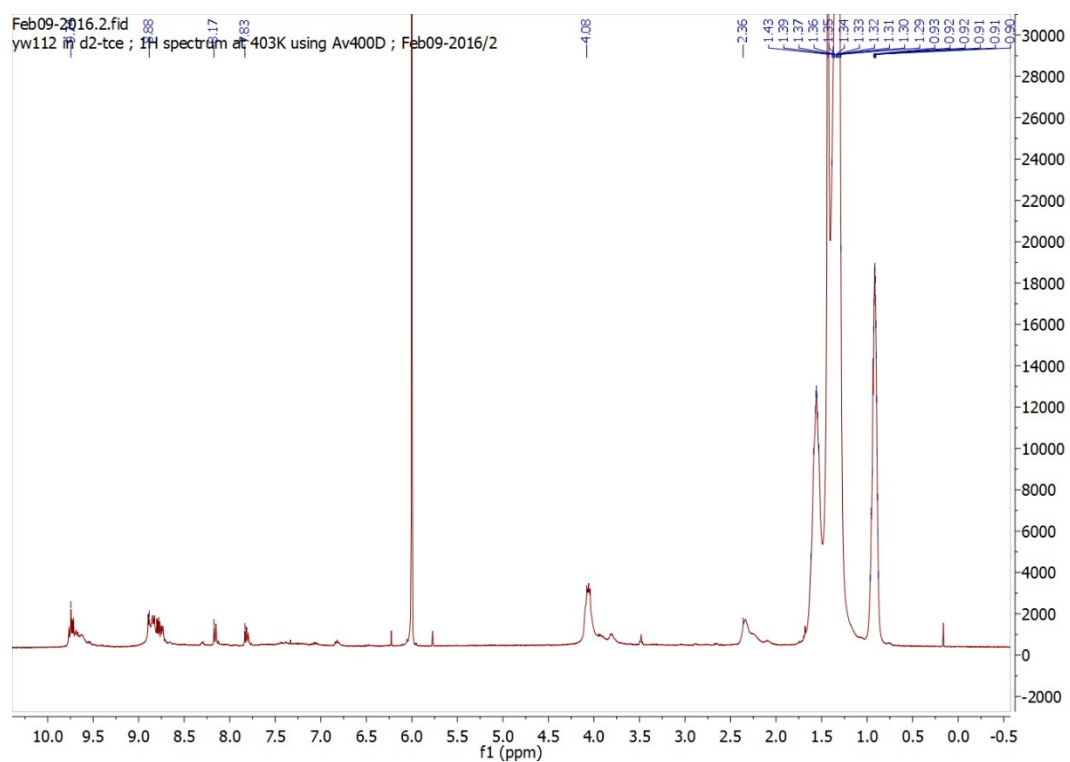

**Figure S20:**  $^1\text{H}$  NMR of **PAIIBDT** in d<sub>2</sub>-TCE at 393 K.

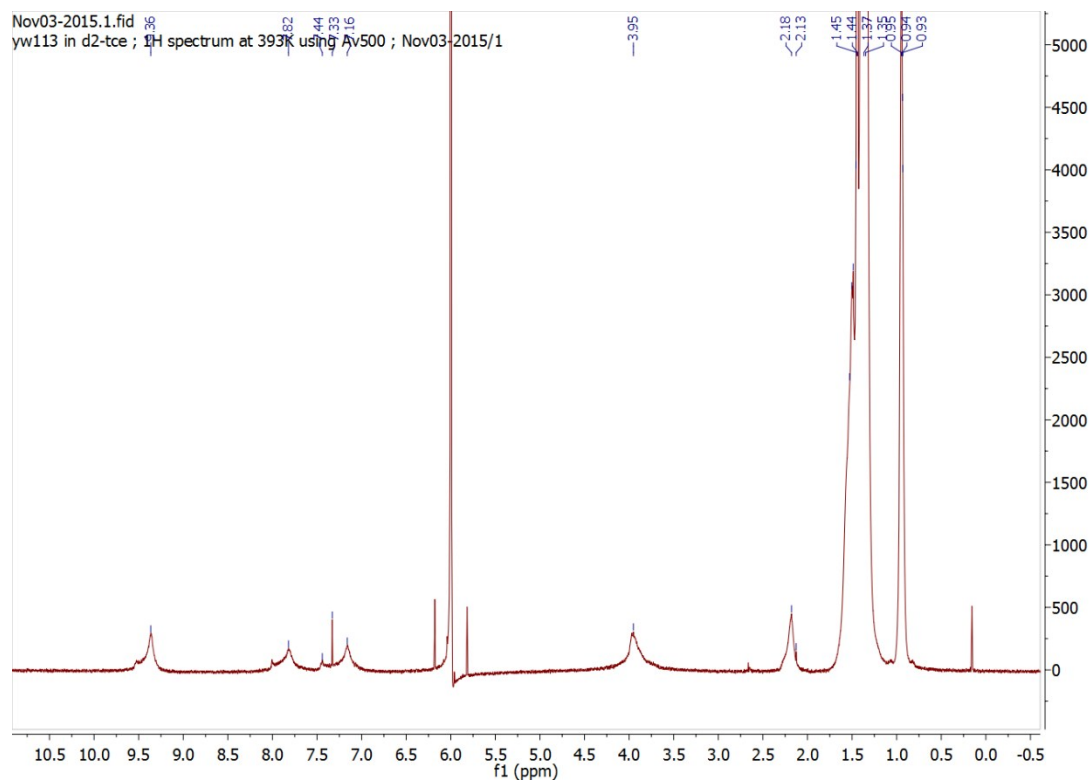

**Figure 21:**  $^1\text{H}$  NMR of PAIIDSe in  $\text{d}_2\text{-TCE}$  at 393 K.
